# Supplementary material
Source: MDPI journal article supplement (https://www.mdpi.com/1424-8247/16/5/667)
Supplement: s1 [file s1]

## Supplementary Materials

**Table S1.** Overview of physical and chemical properties of the substances propofol<sup>20</sup>,  $\beta$ -CD<sup>14</sup> and HP $\beta$ CD<sup>21</sup>.

| Substances            | Molecular weight | Melting point | Boiling point | pKa Value |
|-----------------------|------------------|---------------|---------------|-----------|
| Propofol              | 178,14 g/mol     | 13 °C         | 256 °C        | 11,1      |
| $\beta$ -Cyclodextrin | 1134,99 g/mol    | 290 °C        | -             | -         |
| HP $\beta$ CD         | 1541,55 g/mol    | 278 °C        | -             | -         |

**Table S2.** Calculations for the cytotoxicity tests and the comet assay.

|                                                           |                                                       |
|-----------------------------------------------------------|-------------------------------------------------------|
| <b>Propofol dose</b>                                      | 26 mg/kg = 26 $\mu$ g/g                               |
| <b>mouse weight</b>                                       | 25 g                                                  |
| <b>Dose of Propofol/Maus</b>                              | 25g * 26 $\mu$ g/g = 650 $\mu$ g/maus                 |
| <b>H<sub>2</sub>O-Volume of mice</b>                      | 25g * 78 % = 19,5 ml                                  |
| <b>Propofol concentration</b>                             | 650 $\mu$ g/Maus / 19,5 mL = 33,3 $\mu$ g/mL          |
| <b>Na-Propofolat/HP<math>\beta</math>CD concentration</b> | 33,3 $\mu$ g/mL * 15,15 = 504,5 $\mu$ g/mL            |
| <b>Propofol/HP<math>\beta</math>CD concentration</b>      | 33,3 $\mu$ g/mL * 15,15 = 504,5 $\mu$ g/mL            |
| <b>HP<math>\beta</math>CD concentration</b>               | 504,5 $\mu$ g/mL - 33,3 $\mu$ g/ml = 471,2 $\mu$ g/mL |

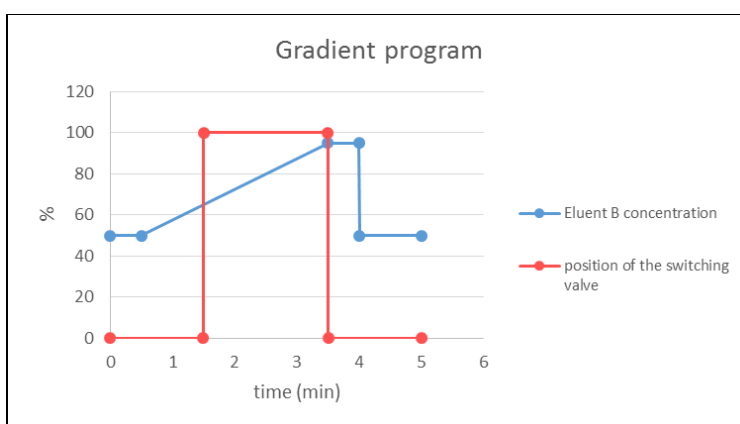

**Figure S1.** Gradient program for the elution of propofol;  $t_R = 2.340$  min.
